# Supplementary material for: Serum Leptin Levels, Nutritional Status, and the Risk of Healthcare-Associated Infections in Hospitalized Older Adults
Source: MDPI journal article supplement (doi:10.3390/nu14010226), 2022-01-05
Supplement: s1 [file s1]

**Table S1.** Sensitivity analysis. Multivariate analyses of women with at least one healthcare-associated infection vs. women without infections (n = 168).

|                                                  | OR [95%CI]        | <i>p</i> Value |
|--------------------------------------------------|-------------------|----------------|
| CIRS-G score <sup>a</sup>                        | 1.54 [1.02–2.32]  | 0.039          |
| Invasive procedure                               | 6.38 [2.70–15.09] | <0.001         |
| Naïve CD8+ T-cells (CD45RA+CD62L+)% <sup>b</sup> | 0.68 [0.47–0.99]  | 0.048          |
| Serum leptin level 4.2 µg/L <sup>c</sup>         | 2.25 [1.02–5.11]  | 0.045          |

OR—odds ratio; CI—confidence interval; CIRS-G—Cumulative Illness Rating Scale, Geriatric. The multivariate analysis was adjusted for all variables of the model. The odds ratios [95%CI] estimated using logistic regression models are quoted for <sup>a</sup> a 1-SD increment in the log transformed values or <sup>b</sup> a 1-SD decrease in the log transformed values. <sup>c</sup> The leptin level was dichotomized according to the lowest quartile. 4.2 µg/L is the lowest quartile of serum leptin among women.
